# Supplementary material for: Molecular Mechanism of Stimulation of Na-K-ATPase by Leukotriene D4 in Intestinal Epithelial Cells
Source: MDPI journal article supplement (doi:10.3390/ijms22147569), 2021-07-15
Supplement: s1 [file s1]

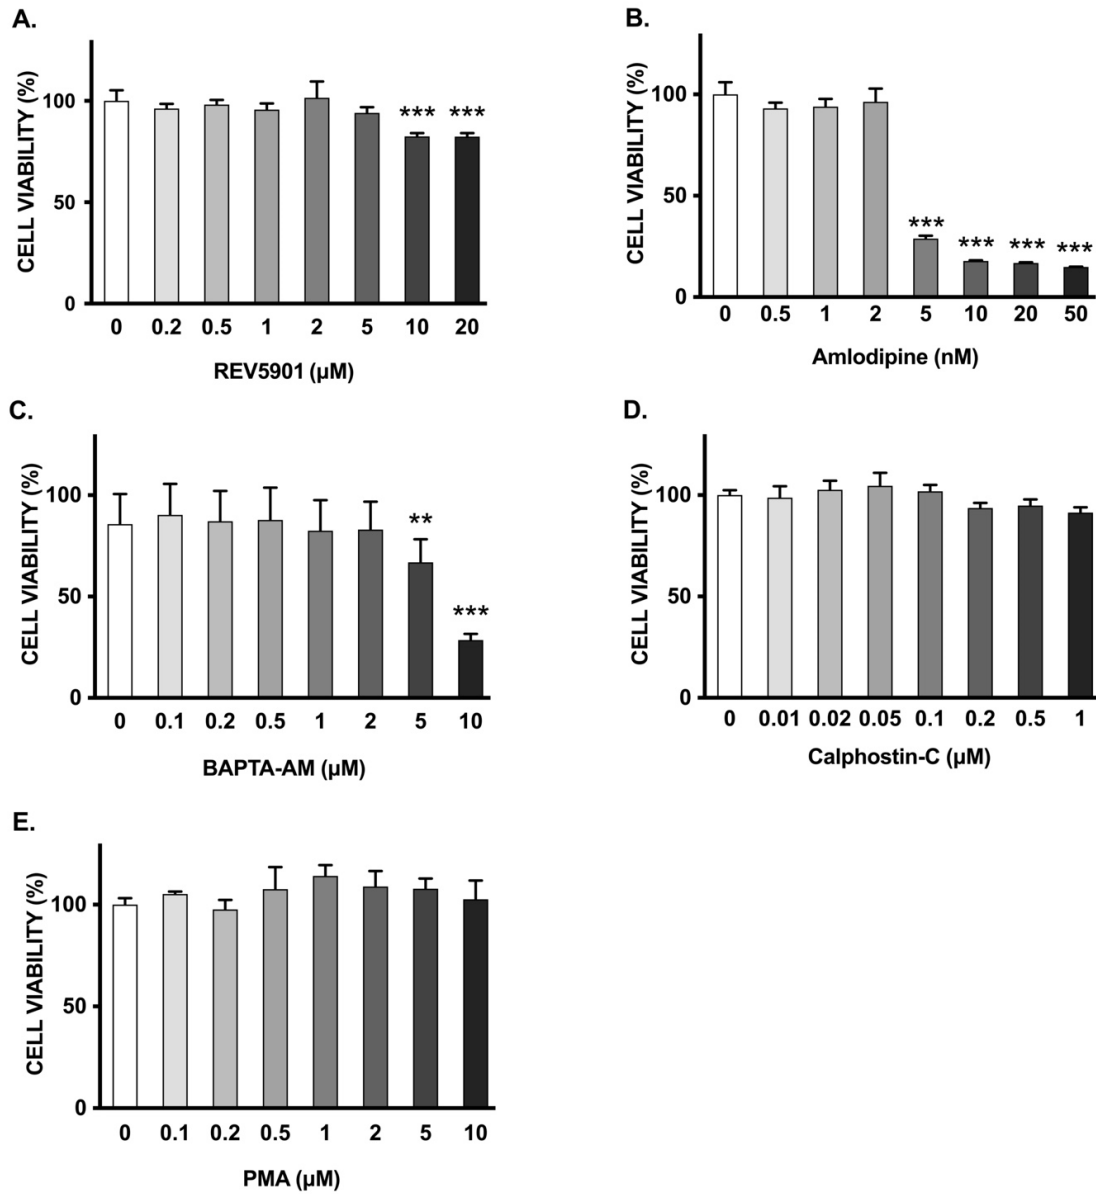

**Figure S1. Effect of different concentration of reagents (drugs) exposure for 24 hours on Intestinal epithelial cell (IEC-18) viability.** A. REV5901. B. Amlodipine. C. BAPTA-AM. D. Calphostin-C. E. PMA (Phorbol 12-myristate 13-acetate). Measurement of cell Viability by MTT assay. Values are relative to 0 μM and are represented as means ± SEM (n=6, Dunnetts's multiple comparisons test). \*\*,  $p < 0.01$  vs 0 μM, \*\*\*,  $p < 0.001$  vs 0 μM.
